# Supplementary material for: Genome-wide misexpression of X-linked versus autosomal genes associated with hybrid male sterility
Source: HighWire-hosted journal article supplement (doi:10.1101/gr.076620.108), 2010-05-28
Supplement: SOM-2.pdf [file SOM-2.pdf]

Table S2: Genes which differ significantly in abdomen expression between fertile and sterile introgression lines for delta =1.6

| id          | FlyBase     | arm | Score (d) | Numerator (r) | Denominator (s+s0) | Fold Change | q-value(False Discovery Rate) | Mean Fertile Expression(log2) | Mean Sterile Expression(log2) | ttest_p-value |
|-------------|-------------|-----|-----------|---------------|--------------------|-------------|-------------------------------|-------------------------------|-------------------------------|---------------|
| 145795_at   | FBgn0031653 | 2L  | 7.93144   | 1.85068       | 0.23333            | 3.59862     | 0                             | 8.30304                       | 10.15372                      | 0.00021       |
| 150588_at   | FBgn0039330 | 3R  | 6.53679   | 2.43518       | 0.37253            | 5.54970     | 0                             | 6.63453                       | 9.06971                       | 0.00475       |
| 150423_at   | FBgn0039051 | 3R  | 4.47766   | 1.02520       | 0.22896            | 2.02826     | 0                             | 5.49839                       | 6.52358                       | 0.00272       |
| 147126_i_at | FBgn0033788 | 2R  | 4.17456   | 2.37773       | 0.56958            | 5.44454     | 0                             | 6.39876                       | 8.77649                       | 0.01008       |
| 150193_at   | FBgn0038702 | 3R  | 4.09594   | 1.13771       | 0.27776            | 2.18287     | 0                             | 6.09118                       | 7.22889                       | 0.00727       |
| 148255_at   | FBgn0035667 | 3L  | 4.08922   | 0.98579       | 0.24107            | 1.97220     | 0                             | 10.61048                      | 11.59626                      | 0.00373       |
| 143603_i_at | FBgn0010358 | 2R  | -7.50971  | -1.93881      | 0.25817            | 0.26292     | 0                             | 10.33400                      | 8.39519                       | 0.00206       |
| 142132_at   | FBgn0034716 | 2R  | -5.40902  | -1.25857      | 0.23268            | 0.41826     | 0                             | 7.19704                       | 5.93848                       | 0.00062       |
| 150703_at   | FBgn0039475 | 3R  | -4.72915  | -1.08421      | 0.22926            | 0.47474     | 0                             | 10.97886                      | 9.89465                       | 0.00873       |
| 151094_at   | FBgn0040609 | 3R  | -4.72172  | -0.66483      | 0.14080            | 0.63095     | 0                             | 8.29680                       | 7.63197                       | 0.00021       |
| 150702_at   | FBgn0039474 | 3R  | -4.66850  | -1.00373      | 0.21500            | 0.49915     | 0                             | 10.88099                      | 9.87726                       | 0.00087       |
| 143470_at   | FBgn0004431 | 3L  | -3.90948  | -0.69692      | 0.17826            | 0.61741     | 0                             | 7.54621                       | 6.84929                       | 0.00107       |
| 141418_at   | FBgn0036024 | 3L  | -3.63178  | -0.76872      | 0.21166            | 0.58816     | 0                             | 9.40462                       | 8.63591                       | 0.00335       |

Table S3: Expression differences on autosomal arms in the testes the fertile (F) and sterile (S) introgression lines

| Autosomal Arm | # of genes detected <sup>1</sup> | Cutoff criteria for S $\neq$ F | # genes with significant expression difference between S and F males |       |            |                             |
|---------------|----------------------------------|--------------------------------|----------------------------------------------------------------------|-------|------------|-----------------------------|
|               |                                  |                                | S < F                                                                | S > F | S $\neq$ F | % (S $\neq$ F) <sup>2</sup> |
| 2L            | 2052                             | $\Delta = 1.6$                 | 179                                                                  | 112   | 291        | (14.18%)                    |
| 2R            | 2231                             | $\Delta = 1.6$                 | 200                                                                  | 163   | 363        | (16.27%)                    |
| 3L            | 2163                             | $\Delta = 1.6$                 | 191                                                                  | 101   | 292        | (13.50%)                    |
| 3R            | 2803                             | $\Delta = 1.6$                 | 259                                                                  | 134   | 393        | (14.02%)                    |

<sup>1</sup> Genes with Log<sub>2</sub>(signal intensity) >6.2

<sup>2</sup> Percentage of genes that show expression difference among those detected.

**Table S4** The number of under-expressed genes vs the number of over-expressed genes in F vs. S male testes

| Platform<br>(# of genes detected) | Method of analysis       | # genes with significant expression<br>difference between S and F males |      |              |
|-----------------------------------|--------------------------|-------------------------------------------------------------------------|------|--------------|
|                                   |                          | S<F                                                                     | S>F  | (S<F)/ (S>F) |
| <u>X</u>                          |                          |                                                                         |      |              |
| Microarray (1683)                 | t-test                   | 193                                                                     | 100  | 1.93         |
|                                   | SAM ( $\Delta = 1.6$ )   | 103                                                                     | 26   | 3.96         |
| RNA-seq (1410)                    | Fisher's exact (p<0.005) | 63                                                                      | 42   | 1.50         |
|                                   | Fisher's exact (p<0.001) | 52                                                                      | 32   | 1.63         |
| <u>Autosomes</u>                  |                          |                                                                         |      |              |
| Microarray (9289)                 | t-test                   | 1374                                                                    | 1201 | 1.14         |
|                                   | SAM ( $\Delta = 1.6$ )   | 838                                                                     | 510  | 1.64         |
| RNA-seq (7628)                    | Fisher's exact (p<0.005) | 454                                                                     | 467  | 0.98         |
|                                   | Fisher's exact (p<0.001) | 365                                                                     | 358  | 1.02         |

**Table S5** Gene Ontology classification of genes underexpressed in testis of sterile males. Nested categories are shown indented, below their parent. Only genes for which functional annotation exists are included. Note that categories may contain overlapping sets of genes, so nested categories will not sum to the totals of their parents.

| Category                                     | GO         | Autosome   |           |                         | X          |           |                         | X <sup>2</sup> P |                                                                |
|----------------------------------------------|------------|------------|-----------|-------------------------|------------|-----------|-------------------------|------------------|----------------------------------------------------------------|
|                                              |            | # of genes | # changed | Fraction underexpressed | # of genes | # changed | Fraction underexpressed |                  |                                                                |
| <b>Biological process</b>                    | GO:0008150 |            |           |                         |            |           |                         |                  |                                                                |
| behavior                                     | GO:0007610 | 90         | 11        | 0.122                   | 35         | 2         | 0.057                   | 0.955            | 0.3284                                                         |
| cell communication                           | GO:0007154 | 1027       | 114       | 0.111 *                 | 216        | 18        | 0.083 *                 | 1.183            | 0.2768                                                         |
| cellular process                             | GO:0009987 | 4313       | 424       | 0.098 *                 | 790        | 43        | 0.054                   | 13.239           | 0.0003                                                         |
| cell differentiation                         | GO:0030154 | 207        | 25        | 0.121                   | 42         | 3         | 0.071                   | 0.700            | 0.4027                                                         |
| regulation of cellular process               | GO:0050794 | 224        | 32        | 0.143 **                | 49         | 3         | 0.061                   | 1.944            | 0.1632 (includes regulation of cellular physiological process) |
| cellular physiological process               | GO:0050875 | 3921       | 387       | 0.099 *                 | 721        | 39        | 0.054                   | 12.449           | 0.0004                                                         |
| cell cycle                                   | GO:0007049 | 320        | 21        | 0.066                   | 79         | 3         | 0.038                   | 0.772            | 0.3796                                                         |
| cell death                                   | GO:0008219 | 185        | 30        | 0.162 **                | 26         | 1         | 0.038                   | 2.256            | 0.1331                                                         |
| cell division                                | GO:0051301 | 77         | 8         | 0.104                   | 22         | 2         | 0.091                   | 0.026            | 0.8716                                                         |
| cell motility                                | GO:0006928 | 154        | 21        | 0.136 *                 | 32         | 2         | 0.063                   | 1.088            | 0.2969                                                         |
| cell organization and biogenesis             | GO:0016043 | 557        | 58        | 0.104                   | 119        | 10        | 0.084                   | 0.362            | 0.5474                                                         |
| cell proliferation                           | GO:0008283 | 211        | 22        | 0.104                   | 37         | 5         | 0.135 *                 | 0.244            | 0.6215                                                         |
| cellular metabolism                          | GO:0044237 | 2846       | 274       | 0.096                   | 506        | 26        | 0.051                   | 9.144            | 0.0025                                                         |
| chromosome segregation                       | GO:0007059 | 82         | 5         | 0.061                   | 16         | 0         | 0.000                   | 0.966            | 0.3256                                                         |
| regulation of cellular physiological process | GO:0051244 | 160        | 22        | 0.138 *                 | 36         | 3         | 0.083                   | 0.619            | 0.4316 (significance due to cell death)                        |
| transport                                    | GO:0006810 | 895        | 89        | 0.099                   | 163        | 9         | 0.055                   | 2.742            | 0.0977                                                         |

|                    |            |      |    |     |   |       |    |       |     |   |    |   |       |    |       |        |            |                     |
|--------------------|------------|------|----|-----|---|-------|----|-------|-----|---|----|---|-------|----|-------|--------|------------|---------------------|
| development        | GO:0007275 | 1077 | 77 | 118 | 2 | 0.110 | *  | 0.026 | 222 | 8 | 21 | 1 | 0.095 | ** | 0.125 | 0.351  | 0.553      | 40.1790             |
| male gamete        | GO:0048232 |      |    |     |   |       |    |       |     |   |    |   |       |    |       | 1.806  |            |                     |
| generation         |            |      |    |     |   |       |    |       |     |   |    |   |       |    |       |        |            |                     |
| physiological      | GO:0007582 | 4458 |    | 435 |   | 0.098 | *  |       | 801 |   | 42 |   | 0.052 |    |       | 14.405 | 0.0001     | (includes           |
| process            |            |      |    |     |   |       |    |       |     |   |    |   |       |    |       |        | cellular   | physiological       |
|                    |            |      |    |     |   |       |    |       |     |   |    |   |       |    |       |        | process)   |                     |
| regulation of      | GO:0050789 | 792  |    | 84  |   | 0.106 |    |       | 143 |   | 9  |   | 0.063 |    |       | 2.118  | 0.1456     |                     |
| biological         |            |      |    |     |   |       |    |       |     |   |    |   |       |    |       |        |            |                     |
| process            |            |      |    |     |   |       |    |       |     |   |    |   |       |    |       |        |            |                     |
| <b>Cellular</b>    | GO:0005575 |      |    |     |   |       |    |       |     |   |    |   |       |    |       |        |            |                     |
| <b>component</b>   |            |      |    |     |   |       |    |       |     |   |    |   |       |    |       |        |            |                     |
| cell               | GO:0005623 | 2339 |    | 197 |   | 0.084 |    |       | 451 |   | 22 |   | 0.049 |    |       | 5.739  | 0.0166     |                     |
| extracellular      |            |      |    |     |   |       |    |       |     |   |    |   |       |    |       |        |            |                     |
| region             | GO:0005576 | 163  |    | 26  |   | 0.160 | ** |       | 30  |   | 4  |   | 0.133 |    |       | 0.098  | 0.7540     |                     |
| organelle          | GO:0043226 | 1560 |    | 114 |   | 0.073 |    |       | 293 |   | 8  |   | 0.027 |    |       | 7.590  | 0.0059     |                     |
| protein complex    | GO:0043234 | 877  |    | 53  |   | 0.060 |    |       | 160 |   | 4  |   | 0.025 |    |       | 3.000  | 0.0833     |                     |
| <b>Molecular</b>   | GO:0003674 |      |    |     |   |       |    |       |     |   |    |   |       |    |       |        |            |                     |
| <b>function</b>    |            |      |    |     |   |       |    |       |     |   |    |   |       |    |       |        |            |                     |
| binding            | GO:0005488 | 1623 |    | 145 |   | 0.089 |    |       | 340 |   | 23 |   | 0.068 |    |       | 1.443  | 0.2297     |                     |
| catalytic activity | GO:0003824 | 2544 |    | 265 |   | 0.104 | ** |       | 461 |   | 26 |   | 0.056 |    |       | 8.647  | 0.0033     | (significant due to |
|                    |            |      |    |     |   |       |    |       |     |   |    |   |       |    |       |        | proteases) |                     |
| enzyme             | GO:0030234 | 254  |    | 23  |   | 0.091 |    |       | 42  |   | 2  |   | 0.048 |    |       | 0.747  | 0.3876     |                     |
| regulator activity |            |      |    |     |   |       |    |       |     |   |    |   |       |    |       |        |            |                     |
| signal             | GO:0004871 | 684  |    | 64  |   | 0.094 |    |       | 141 |   | 10 |   | 0.071 |    |       | 0.622  | 0.4304     |                     |
| transducer         |            |      |    |     |   |       |    |       |     |   |    |   |       |    |       |        |            |                     |
| activity           |            |      |    |     |   |       |    |       |     |   |    |   |       |    |       |        |            |                     |
| structural         | GO:0005198 | 505  |    | 29  |   | 0.057 |    |       | 101 |   | 6  |   | 0.059 |    |       | 0.005  | 0.9414     |                     |
| molecule activity  |            |      |    |     |   |       |    |       |     |   |    |   |       |    |       |        |            |                     |
| transcription      | GO:0030528 | 579  |    | 48  |   | 0.083 |    |       | 116 |   | 4  |   | 0.034 |    |       | 2.905  | 0.0883     |                     |
| regulator activity |            |      |    |     |   |       |    |       |     |   |    |   |       |    |       |        |            |                     |
| translation        | GO:0045182 | 54   |    | 1   |   | 0.019 |    |       | 6   |   | 1  |   | 0.167 |    |       | 3.092  | 0.0787     |                     |
| regulator activity |            |      |    |     |   |       |    |       |     |   |    |   |       |    |       |        |            |                     |
| transporter        | GO:0005215 | 720  |    | 95  |   | 0.132 | ** |       | 129 |   | 8  |   | 0.062 |    |       | 4.113  | 0.0426     |                     |
| activity           |            |      |    |     |   |       |    |       |     |   |    |   |       |    |       |        |            |                     |

\*P < 0.05    \*\*P < 0.01

Table S6 Summary of the number of reads mapped to *Drosophila simulans* genome according to the annotation of dmRefseq from UCSC

|                        | Sterile    |            | Fertile    |            |
|------------------------|------------|------------|------------|------------|
|                        | # of reads | Percentage | # of reads | Percentage |
| Mapped reads           | 15150489   | /          | 25621701   | /          |
| Uniquely mapped reads  | 14308455   | /          | 24383254   | /          |
| Genomic region         |            |            |            |            |
| Exon                   | 9461970    | 66.13%     | 16380909   | 67.18%     |
| Intron                 | 2259120    | 15.79%     | 3681018    | 15.10%     |
| Exon-Intron junction   | 742180     | 5.18%      | 1319187    | 5.41%      |
| intergenic/unannotated | 1845185    | 12.90%     | 3002140    | 12.31%     |

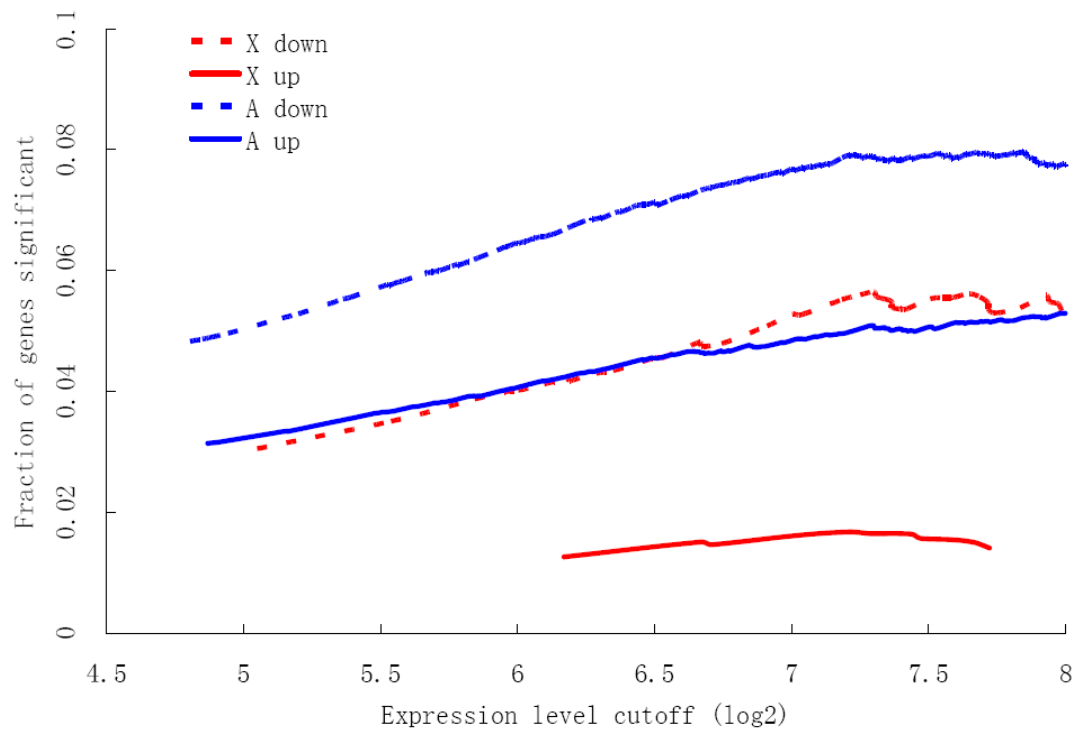

Figure S1: Proportion of genes that are significantly different in expression between testis of fertile and sterile males as called by SAM ( $\Delta = 1.6$ ). The proportion is based on all genes with expression levels greater than a given cutoff. This figure includes the total number of genes in the array.

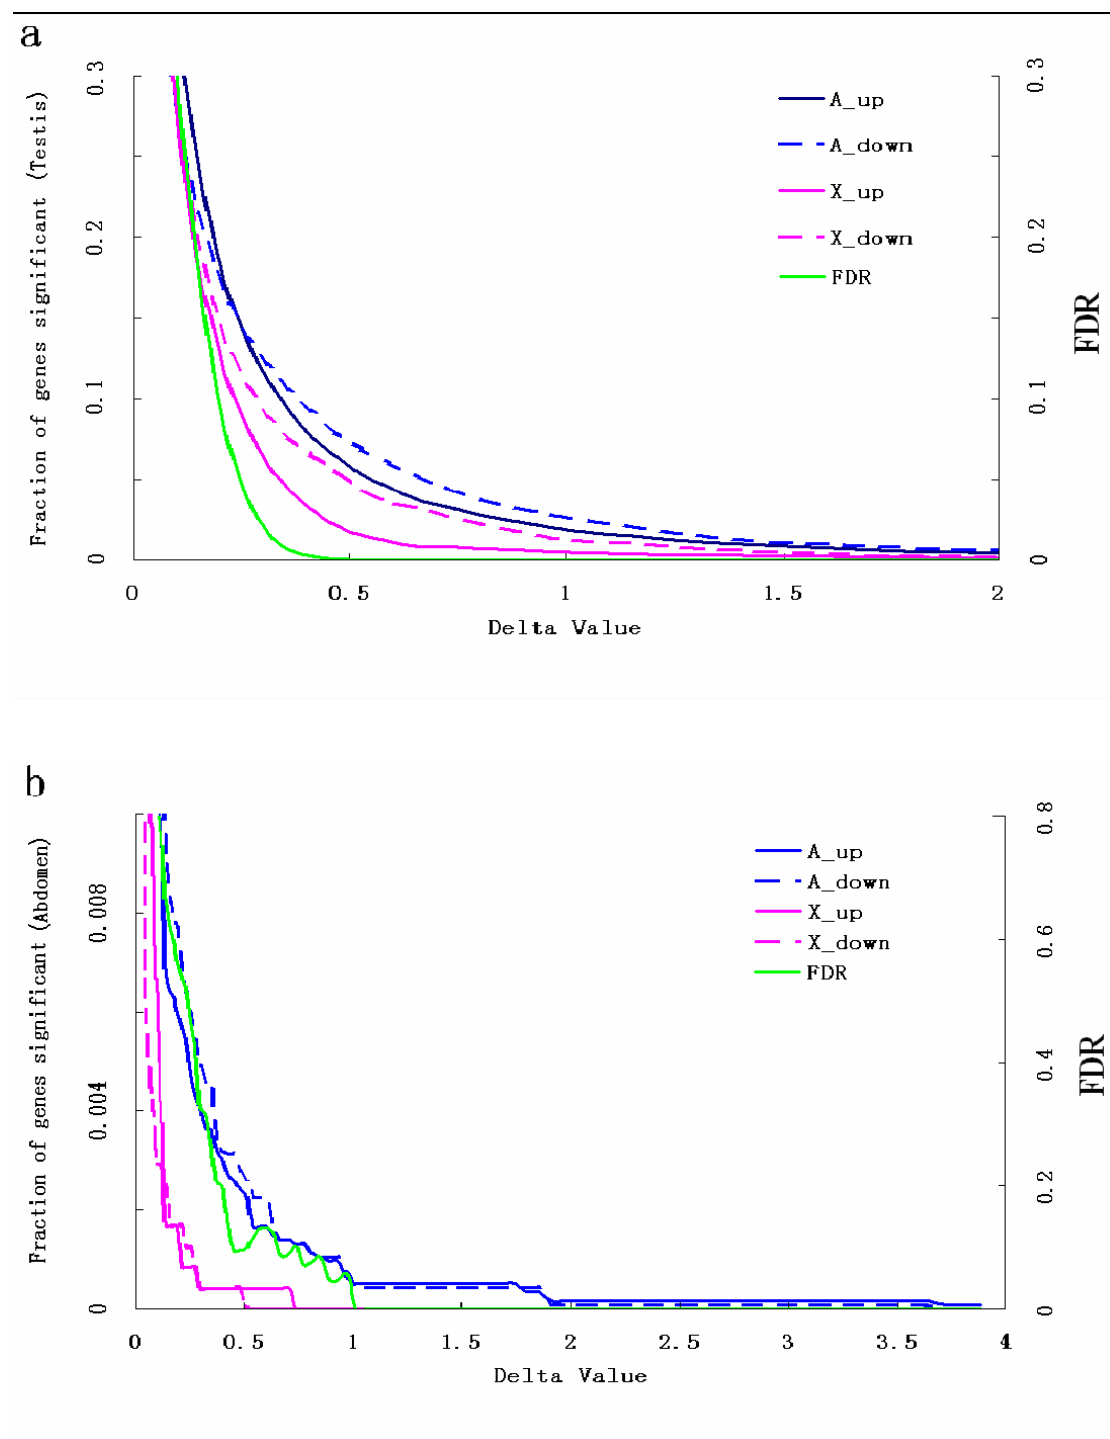

Figure S2: Proportion of genes that are significantly different in expression between fertile and sterile males and calculated false discovery rates for a) testis and b) abdomens as the delta value used to call significance varies. These proportions are calculated for all genes, regardless of expression level. False discovery rates are assessed by permutation.



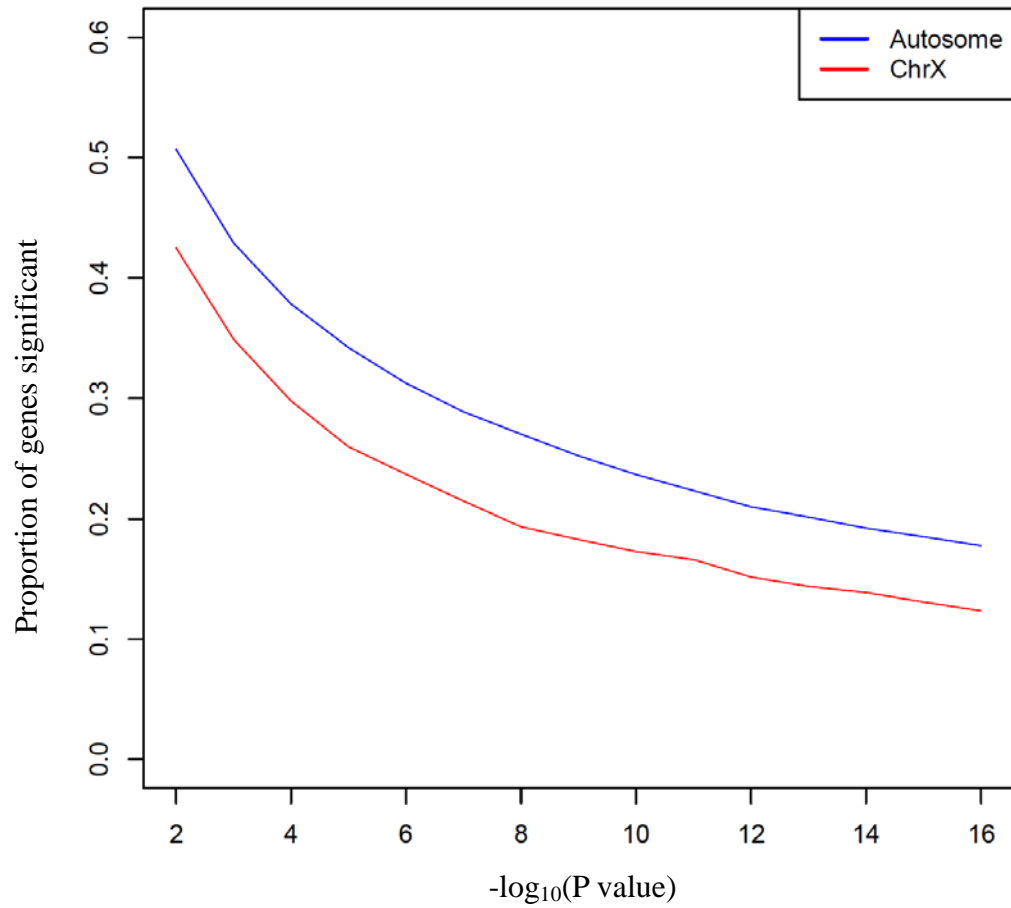

Figure S3: Proportion of genes that are significantly different in expression between testes of fertile and sterile males as a function of  $-\log_{10}(P)$ . The P value is called by Fisher's exact test in RNA-seq analysis. Note that the proportion is lower for X-linked than for autosomal genes at all P values.

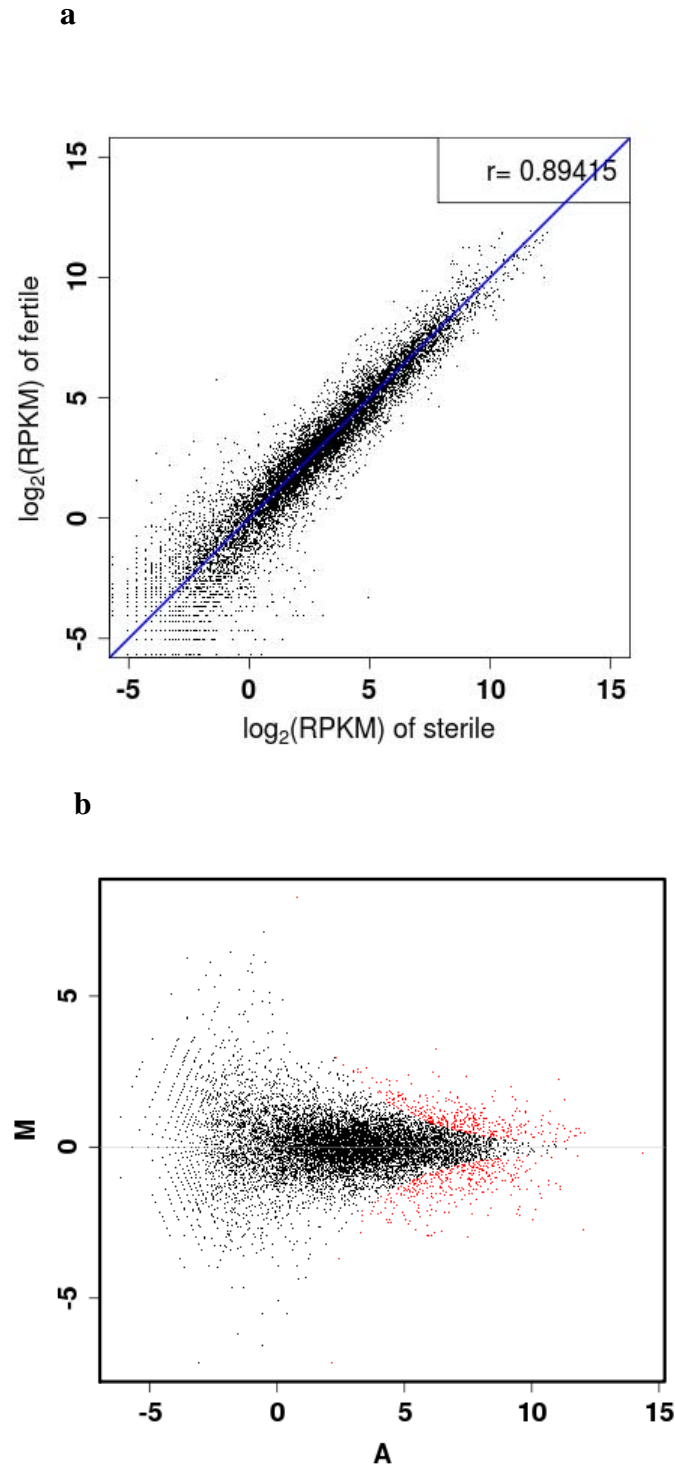

Figure S4 **Scatterplot (a) and MA plot (b) comparing gene expression profiles in sterile and fertile lines.** Each point in the graph presents an individual gene. The red points in the MA-plot are the genes identified as differentially expressed at  $p\text{-value} < 0.001$  by Fisher's exact test. In the MA plot,  $A = [\log_2(\text{RPKM of sterile}) + \log_2(\text{RPKM of fertile})]/2$ ;  $M = \log_2(\text{RPKM of sterile}/\text{RPKM of fertile})$ .

## **Supplemental materials on Haldane's rule in relation to the X:A imbalance hypothesis**

All the issues discussed in this study, including the large X-effect on hybrid sterility, the X:autosome (X:A) imbalance hypothesis and the contrast between hybrid inviability and sterility, were raised to explain the phenomenon commonly referred to as Haldane's rule. According to Haldane's rule (Haldane 1922), in interspecific hybridization, the hemizygous sex (XY males or ZW females) is generally more severely affected than the homozygous sex (XX females or ZZ males) when the effect is asymmetric between sexes.

Muller (1942) proposed the X:A imbalance hypothesis to explain this rule. Hybrids of the homozygous sex have exactly one haploid genome from each parental species. Therefore, gene dosages are balanced between the two genomes. Hybrids of the hemizygous sex, in contrast, have its X chromosome from only one species. Its X and autosomes, hence, are not balanced. For an explicit model on the X:A imbalance in terms of gene expression, see Wu et al. (1996).

The X:A imbalance hypothesis had been commonly accepted until Coyne (1985) published an ingenious experiment that appeared to invalidate the explanation. He chose to study hybridization between *Drosophila simulans* and *D. mauritiana* which yields fertile hybrid females and sterile hybrid males. By using the attached-X technique, Coyne (1985) constructed hybrid females that have the X chromosome from one species and autosomes from both species. These hybrid females have as much X:A imbalance as the hemizygous hybrid males but are quite fertile. Coyne (1985) rejected the X:A imbalance hypothesis in favor of X-Y interaction.

By constructing a series of genotypes specifically to test X:Y interactions, Johnson et al. (1992) subsequently rejected X-Y interaction as the cause of hybrid male sterility between the two species. They suggested that X:autosome interaction should still be considered a possible cause of hybrid male sterility. With respect to Coyne's (1985) test, they reasoned that oogenesis and spermatogenesis are fundamentally very different

developmental processes. The test by Coyne (1985), elegant as it was, should not be applied to hybrid sterility. (Coyne's test should be good for hybrid inviability.)

The male-female difference in the rate of fertility evolution was analyzed in detail by Wu and Davis (1993). They showed that Haldane's rule in mammals and in *Drosophila* is largely an issue of hybrid sterility, with very few cases of hybrid inviability. This analysis has led to what was later referred to as the "fast male evolution" hypothesis (Turelli and Orr 2000). According to Wu and Davis (1993) and Wu and Palopoli (1994), hybrid male sterility has evolved 10-100 fold faster than hybrid inviability.

There have been a series of papers on Haldane's rule (Laurie 1997; Orr 1997; Presgraves and Orr 1998; Turelli 1998; Turelli and Orr 2000; Wu et al. 1996). Although these papers clarify many of the earlier confusions, two issues remain incompletely resolved. First, why has hybrid male sterility evolved so rapidly? Second, can the X:A imbalance hypothesis explain this rapid evolution? If it can, the hypothesis would then explain the majority of cases of Haldane's rule in mammals and in *Drosophila*. (The third and somewhat ancillary issue about Haldane's rule, i.e., the large X effect on hybrid male sterility, is discussed in the main text.)

With respect to the issue of fast evolution of hybrid male sterility, Wu and Davis (1993) suggested two explanations. An explanation is sexual selection driving the evolution of male reproduction. The second explanation (that is not mutually exclusive with the first) is a mechanistic one concerning gene expression regulation. This second explanation was not specific about the mechanism of X:A imbalance as the analysis of whole genome expression was not feasible then. By providing the empirical support for a mechanism whereby the X:A imbalance affects spermatogenesis in the hybrids, we also assume that the same mechanism does not apply to oogenesis or embryogenesis as female fertility and embryonic viability of these hybrids are apparently normal. If true, this current study may provide the missing piece in the explanation for Haldane's rule.

## References

- Coyne J A. 1985. Genetic basis of Haldane's rule. *Nature* 314: 736-738.
- Haldane JBS. 1922. Sex ratio and unisexual sterility in animal hybrids. *J. Genet.* 12: 101-109.
- Hollecher H, Wu C-I. 1996. The genetics of reproductive isolation in the *Drosophila simulans* clade: X vs. autosomal effects and male vs. female effects. *Genetics* 143: 1243-1255.
- Laurie CC. 1997. The weaker sex is heterogametic: 75 years of Haldane's rule. *Genetics* **147**:937-951.
- Johnson NA, Perez DE, Cabot EL, Hollocher H, Wu C-I. 1992. A test of reciprocal X-Y interactions as a cause of hybrid sterility in *Drosophila*. *Nature* 358: 751-753.
- Muller HJ. 1942. Isolation mechanisms, evolution, and temperature. *Biol. Symp.* 6: 71-125.
- Orr HA. 1997 Haldane's rule. *Annu. Rev. Genet.* 28: 195-218.
- Presgraves DC, Orr HA. 1998. Haldane's rule in taxa lacking hemizygous X. *Science* 282: 952-954.
- Turelli M. 1998. The causes of Haldane's rule. *Science* 282: 889-891
- Turelli M, Orr HA. 2000. Dominance, epistasis and the genetics of postzygotic isolation. *Genetics* 154: 1663-1679.
- Wu C-I, Davis AW. 1993. Evolution of postmating reproductive isolation: the composite nature of Haldane's rule and its genetic basis. *Am. Nat.* 142: 187-212.
- Wu C-I, Palopoli MF. 1994. Genetics of postmating reproductive isolation in animals. *Annu. Rev. Genet.* 27: 283-308.
- Wu C-I, Johnson NA, Palopoli MF. 1996. Haldane's rule and its legacy: Why are there so many sterile males? *Trends Ecol. Evol.* 11: 281-284.
